# Supplementary material
Source: publisher figshare collection journal article supplement (https://gsajournals.figshare.com/ndownloader/files/35373760)
Supplement: Supplementary file 1 [file 35373760]

## Sheet: Supplementary Table S4
Supplementary Table S4. Summary of samples and genes in the transcriptome-wide association study (TWAS) pipeline
Filtering or analysis step	Description	Counts
Raw data for RNAseq	Total number of samples	1171
	Number of samples for the noncheck lines	1012
	Number of samples for the check lines	107
	Number of positive controls for RNAseq	52
Filtering (QC) in RNAseq	Total number of removed samples	48
	Total number of retained samples	1123
	Number of retained samples for the noncheck lines	967
	Number of retained samples for the check lines	104
	Number of retained samples of positive controls for RNAseq	52
Sample Filtering (heterozygosity rate < 10%)	Total number of samples	784
	Number of noncheck-line samples	665
	Number of noncheck-lines	664
	Number of check samples	76
	Number of check lines	25
	Number of positive controls	43
	Number of genes	24336
Gene Filtering	Number of removed genes (due to > 50% samples showed zero expression profile)	2195
	Number of retained genes	22141
Outlier removal	Number of outliers with median absolute deviation (MAD) > 100	2008
	Number of removed genes (due to >10% of samples were identified as MAD outliers)	5
	Number of retained genes	22136
	Number of outliers imputed with median rlog-transformed value for a given gene	1020
	Number of genes with at least one outlier (including the removed genes)	137
	Number of genes without any outliers	22004
BLUE	Number of non-converged genes	0
	Number of converged genes (= Number of genes for PEER and TWAS)	22136
	Number of sweet corn, popcorn, or endosperm mutant lines	104
	Number of lines not included in GWAS	15
	Number of lines retained for PEER and TWAS	545
PEER	Optimal number of factors	8
Outlier removal (Studentized residual with Bonferrini α = 0.05)	Number of outlier data points	16227
